# Supplementary material for: Brust–Schiffrin synthesis of catalytic bipodal PdPt nanoparticles with some mechanistic insights
Source: Royal Society of Chemistry journal article supplement (doi:10.1039/c3ra41078a), 2013-01-01
Supplement: c3ra41078a.pdf [file c3ra41078a.pdf]

Electronic Supplementary Information for

**Brust-Schiffrin synthesis of catalytic bipodal PdPt nanoparticles with some mechanistic insights**

Sangbum Han,<sup>a</sup> Vara Prasad Sheela,<sup>a</sup> Wei Cao<sup>b</sup> and Ramjee Balasubramanian<sup>\*a</sup>

<sup>a</sup> Department of Chemistry and Biochemistry, 4541 Hampton Blvd., Old Dominion University, Norfolk, VA, USA. Tel: +1 757-683-3039; E-mail: [bramjee@odu.edu](mailto:bramjee@odu.edu)

<sup>b</sup> Applied Research Center, Old Dominion University, Newport News, VA, USA.

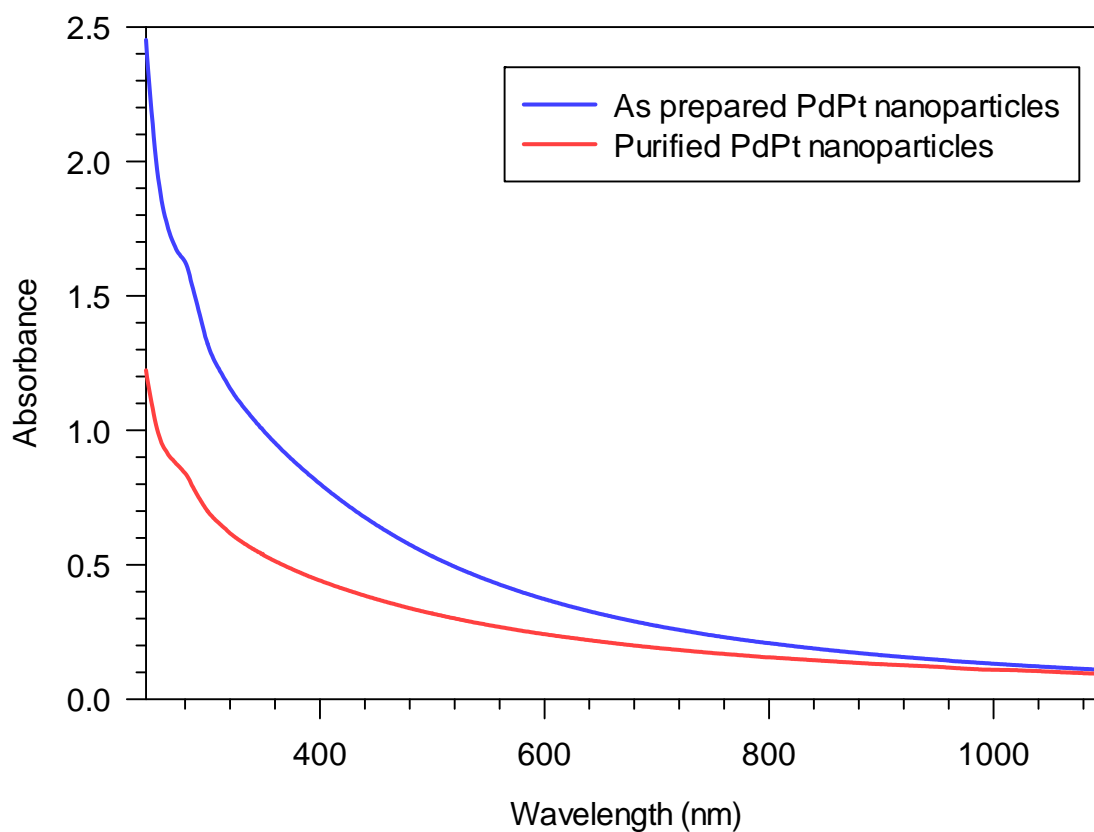

**Fig. S1** UV-vis spectra of as-prepared and purified (precipitated-redispersed) PdPt bimetallic nanoparticles.

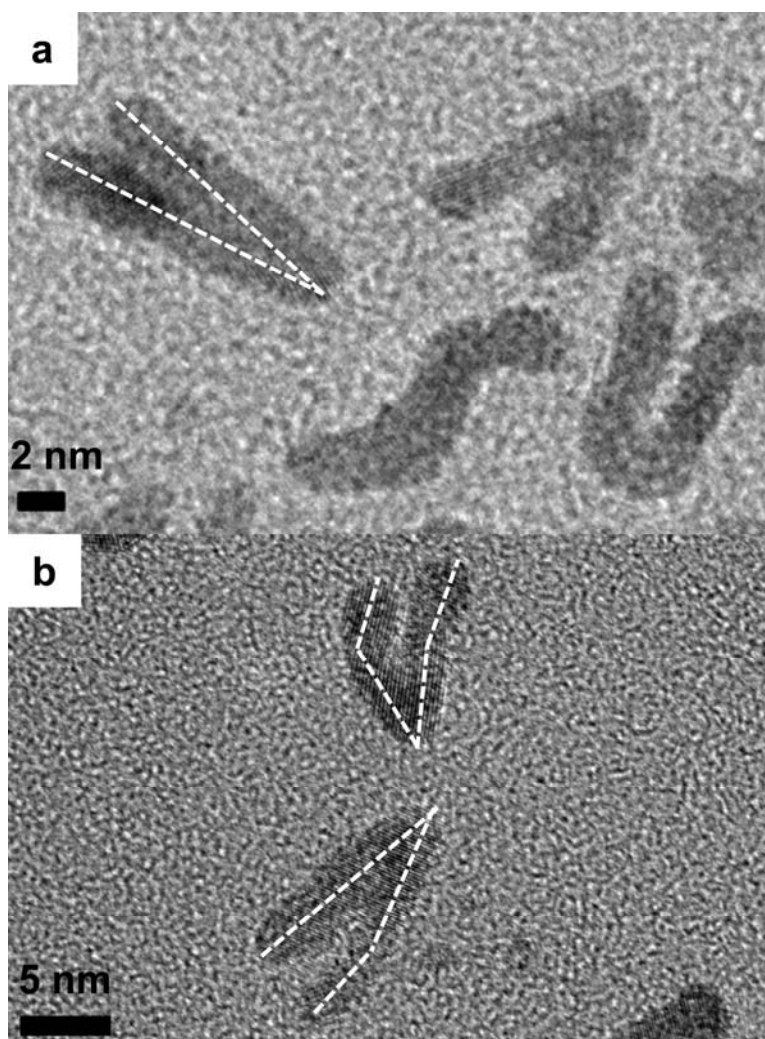

**Fig. S2** TEM analysis of PdPt bimetallic nanoparticles prepared in the presence of resorcinarene amine surfactant at 0 °C.

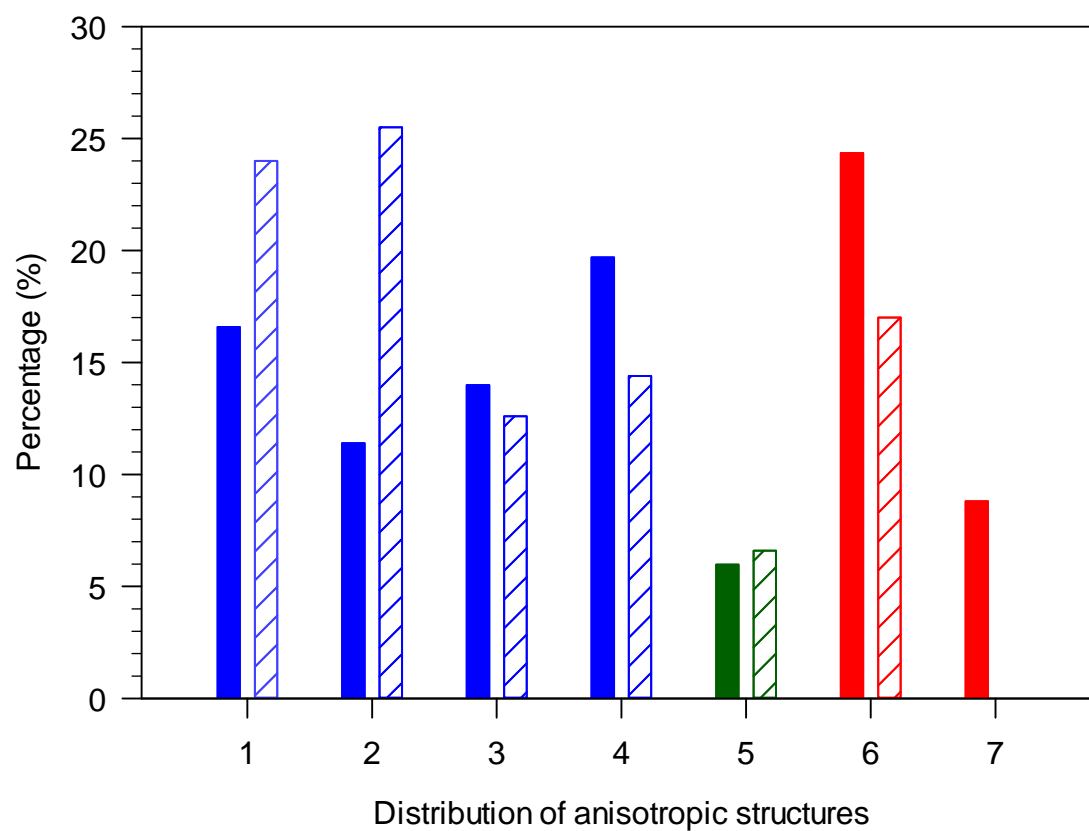

**Fig. S3** Histogram of anisotropic nanostructures in as-prepared (solid bars) and purified (patterned bars) PdPt bimetallic nanoparticles prepared at 0 °C: 1. V, 2. one-arm bent V, 3. both arms bent V, 4. wide open V, 5. U 6. linear and 7. triangular shaped nanoparticles.

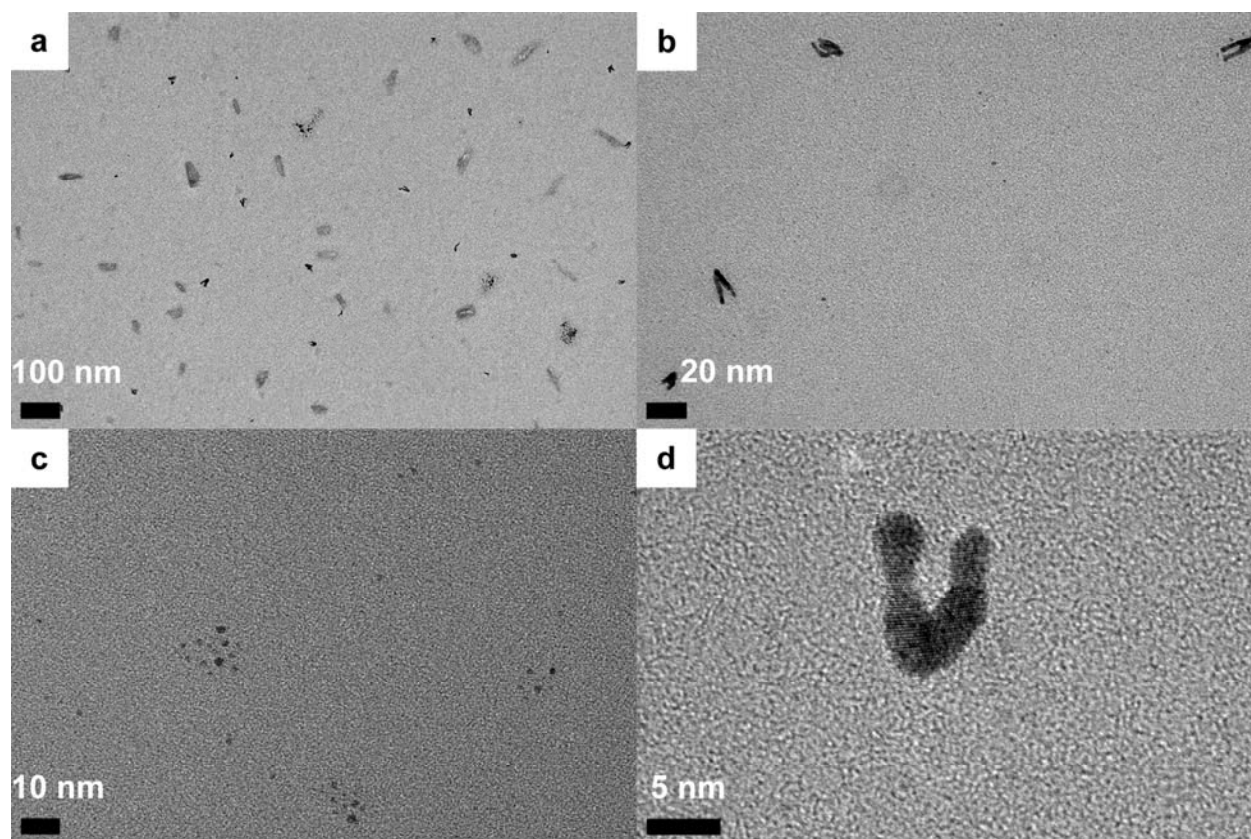

**Fig. S4** TEM images of as-prepared PdPt bimetallic nanoparticles in the presence of resorcinarene surfactant at 0 °C.

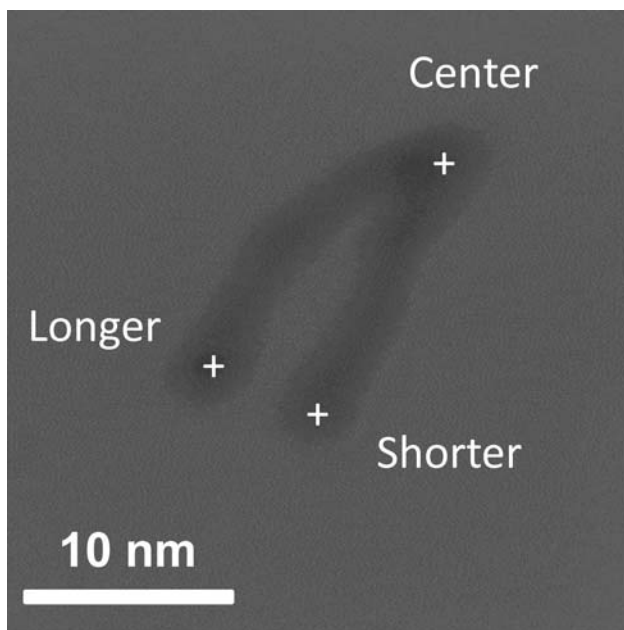

**Fig. S5** Typical locations in anisotropic nanoparticles where STEM spot analysis was done.

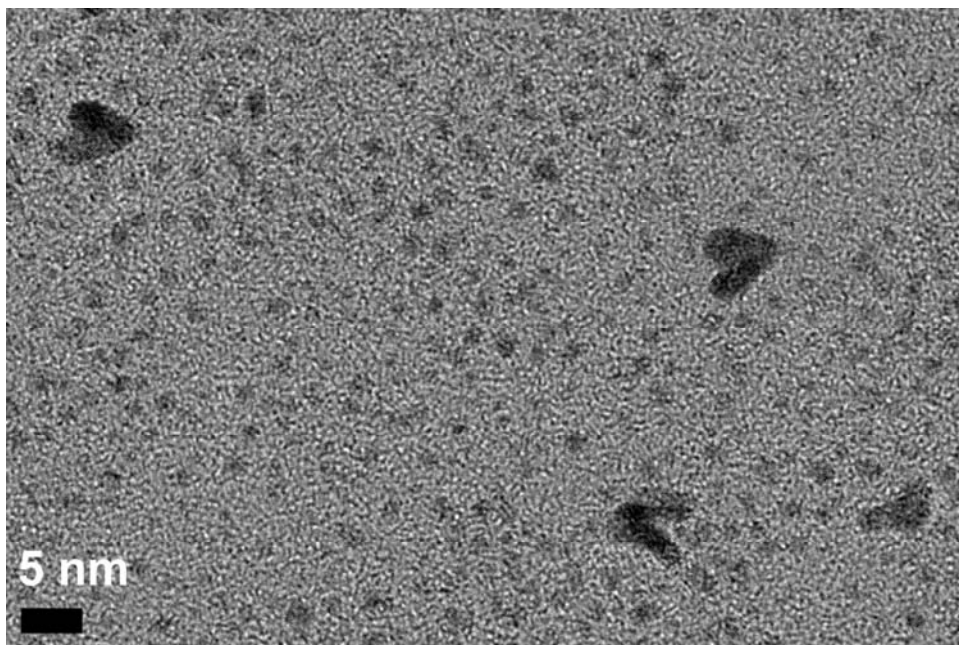

**Fig. S6** TEM image of as-prepared PdPt bimetallic nanoparticles prepared at 0 °C after 5 min of reaction.

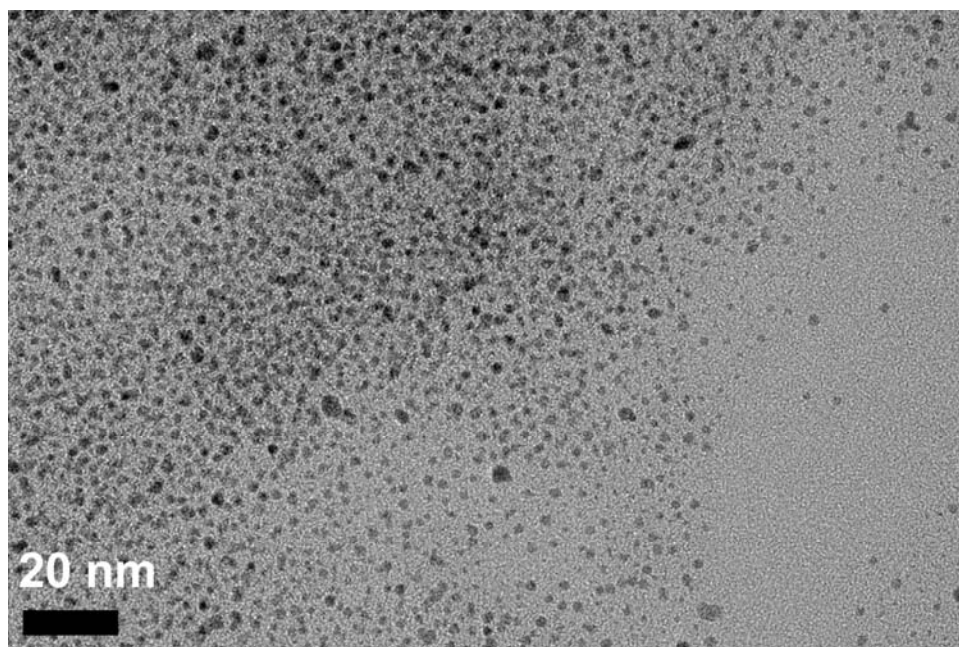

**Fig. S7** TEM image of as-prepared PdPt bimetallic nanoparticles formed with Pd nanoparticle seeds at 0 °C.

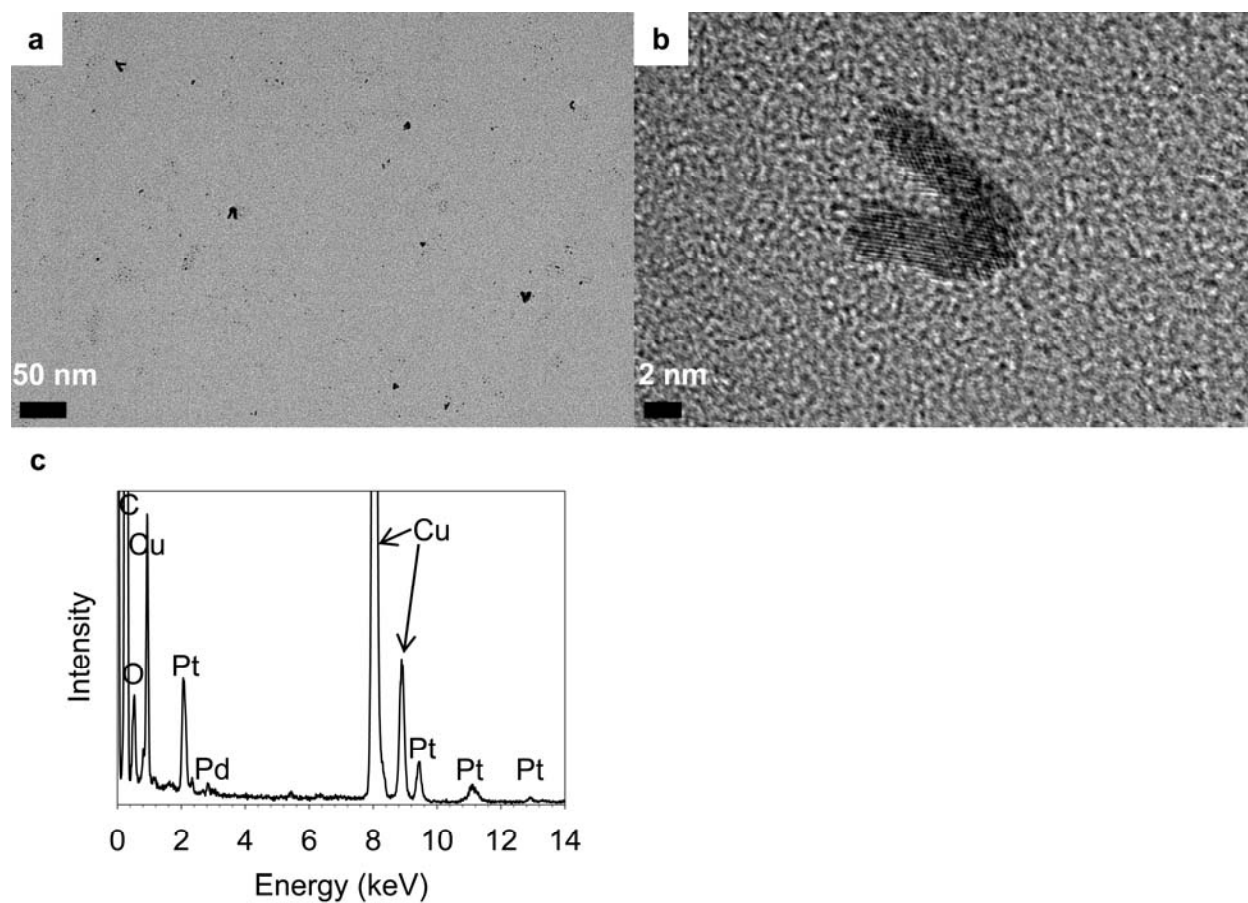

**Fig. S8** TEM (a-b) and EDS (c) of PdPt bimetallic nanoparticles prepared with resorcinarene amine surfactant at room temperature.

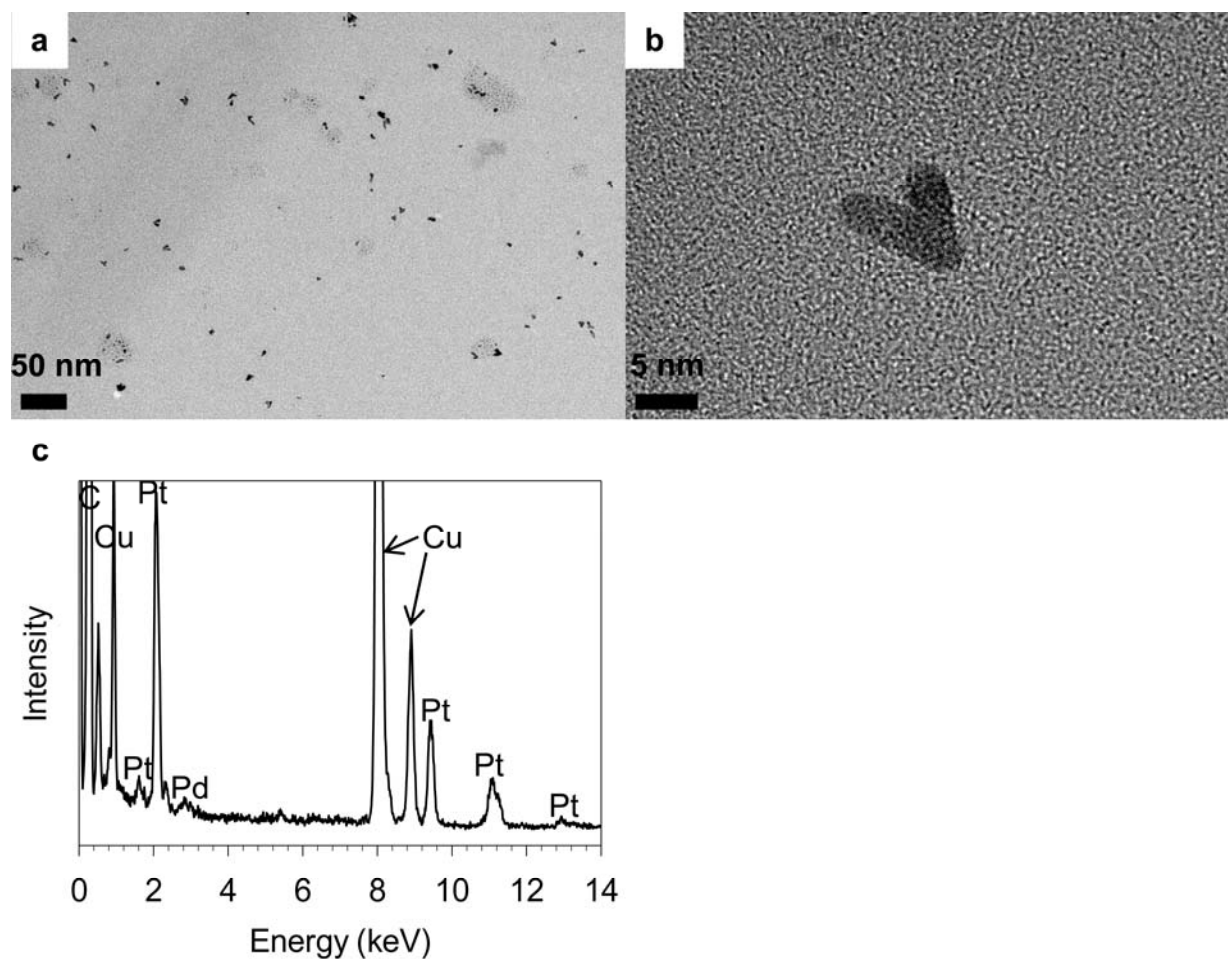

**Fig. S9** TEM (a-b) and EDS (c) data of as-prepared PdPt bimetallic nanoparticles prepared from  $\text{K}_2\text{PtCl}_4$  and  $\text{H}_2\text{PdCl}_4$  at 0  $^\circ\text{C}$ .

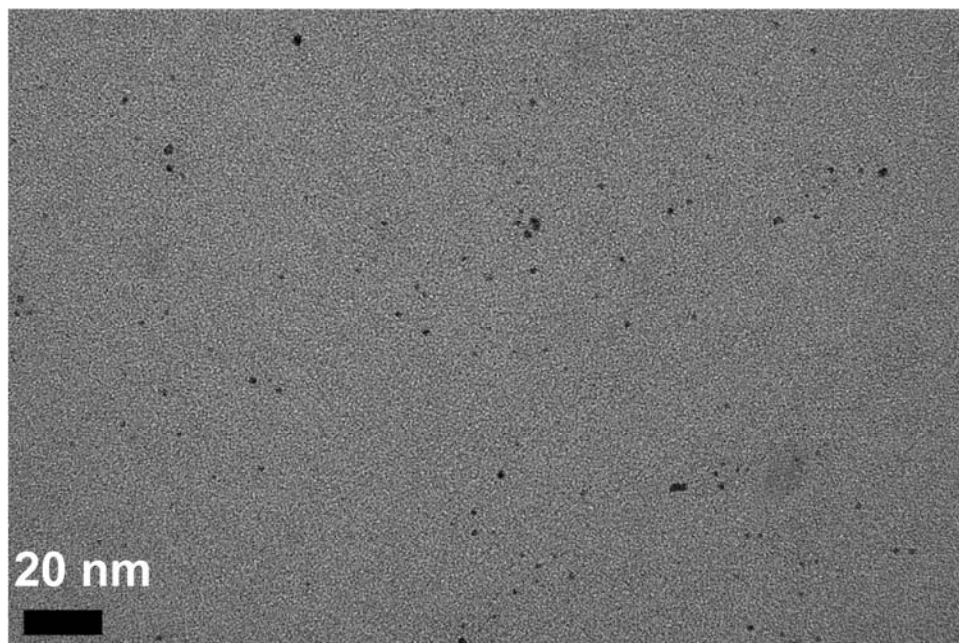

**Fig. S10** TEM image of as-prepared PdPt bimetallic nanoparticles synthesized by a monophasic approach at 0 °C.

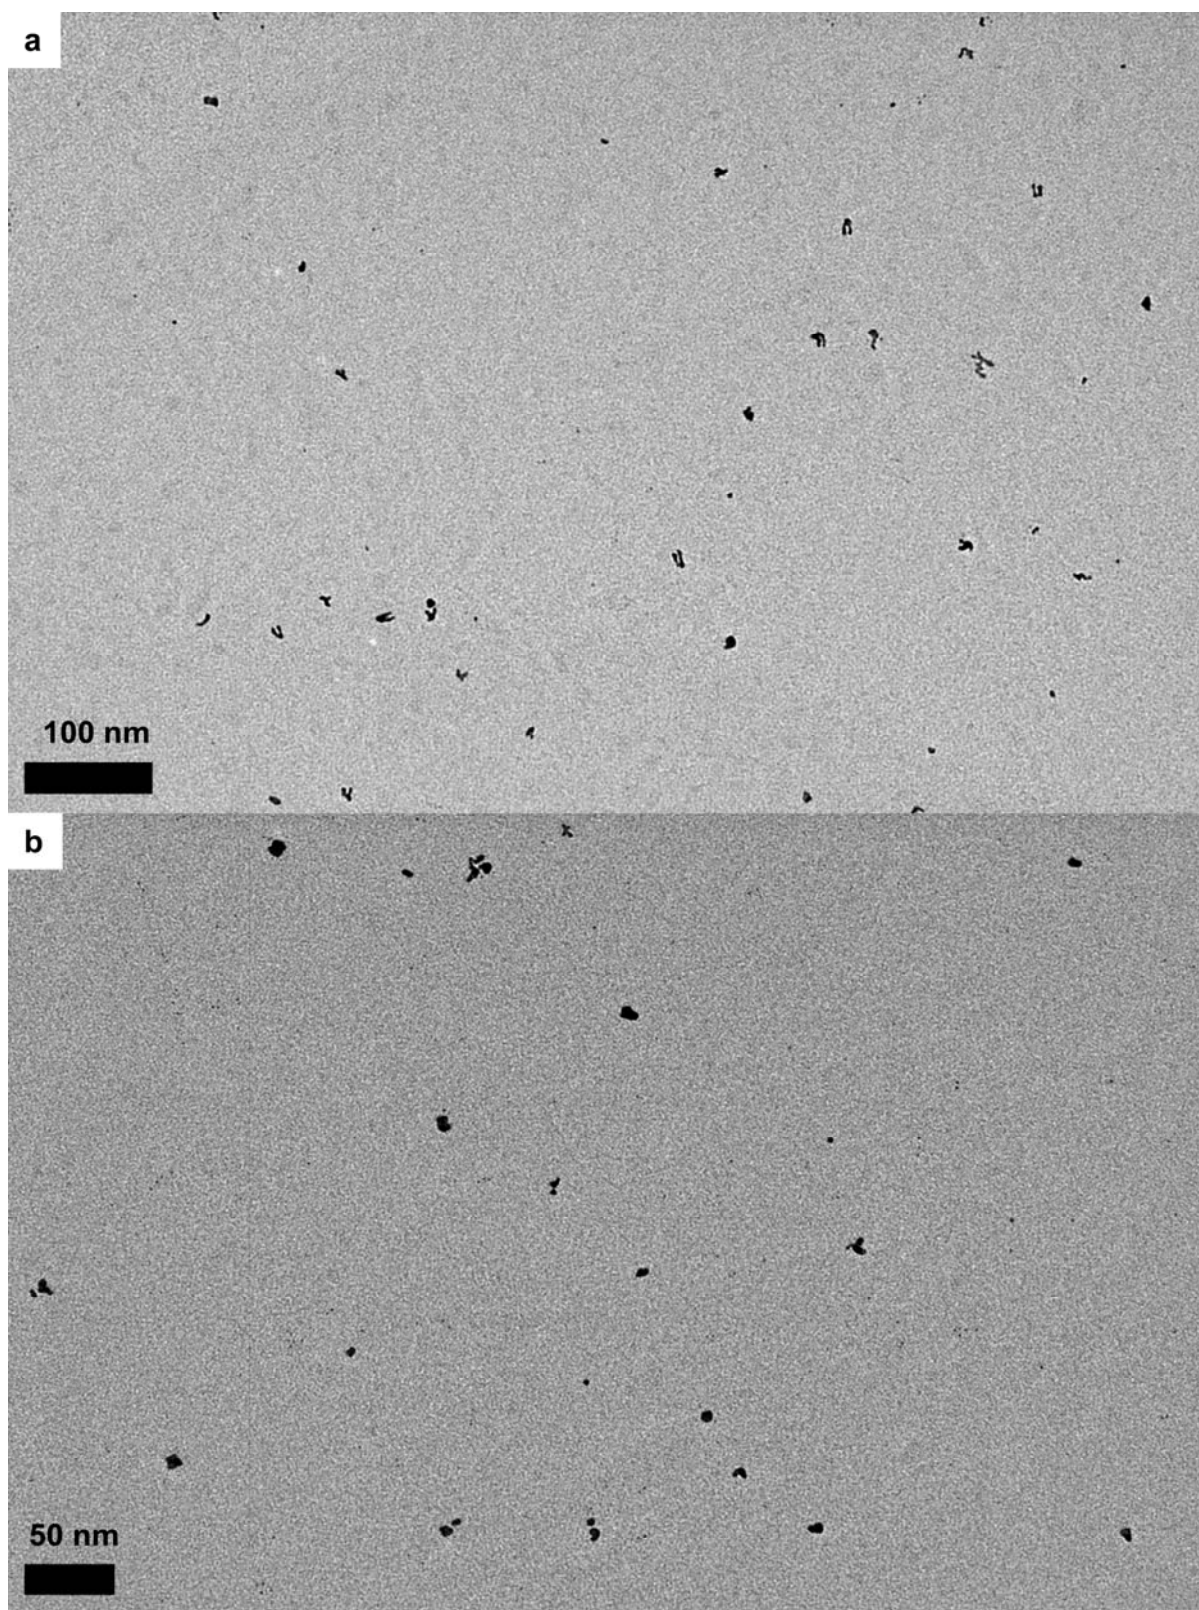

**Fig. S11** TEM image of reversed Brust synthesis carried out with a 10 s (a) and 5 min (b) delay.

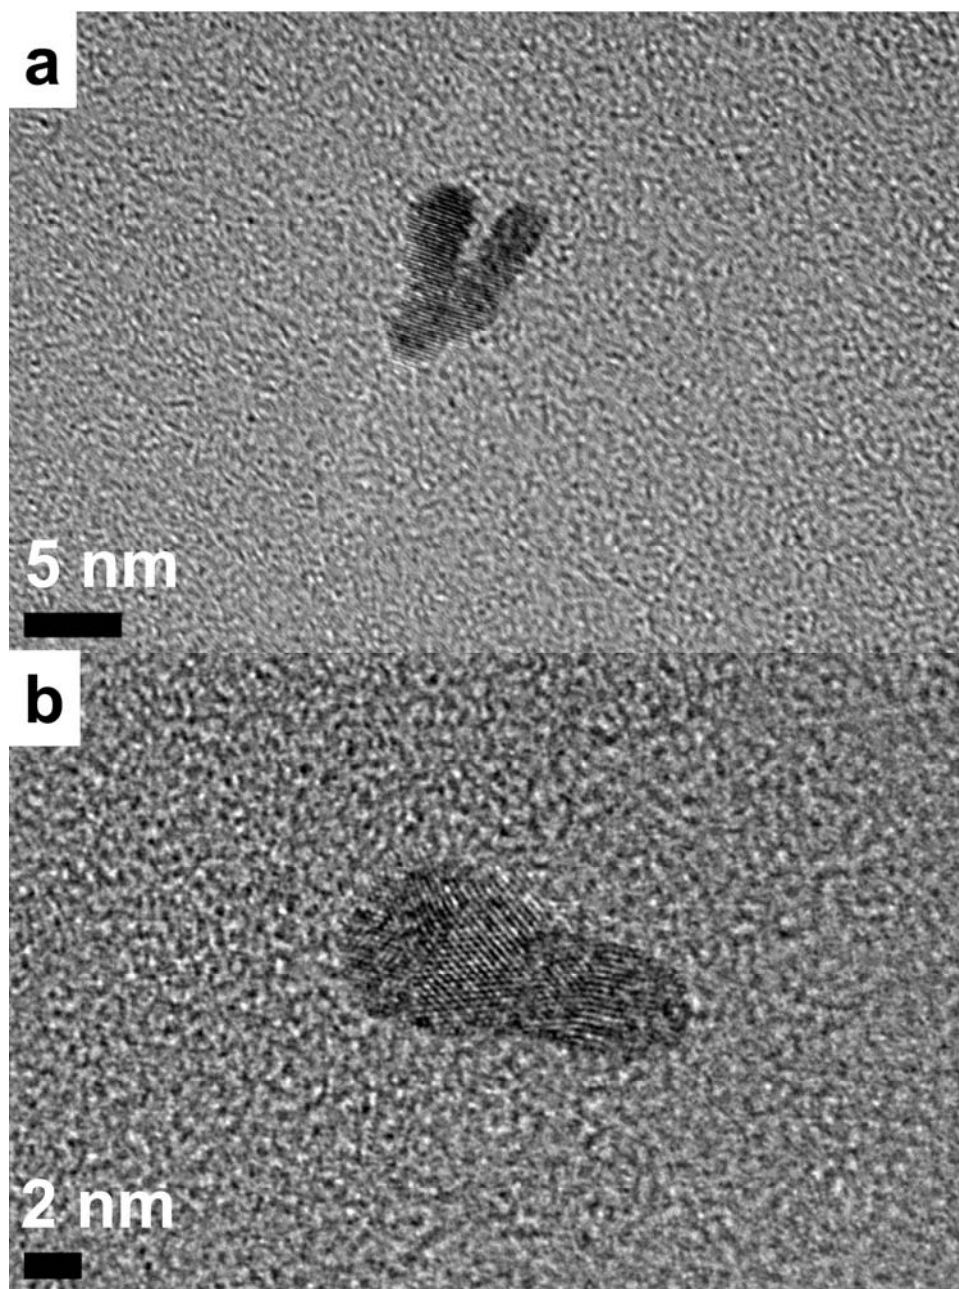

**Fig. S12** HRTEM image of reversed Brust synthesis carried out with a 10 s (a) and 5 min (b) delay.

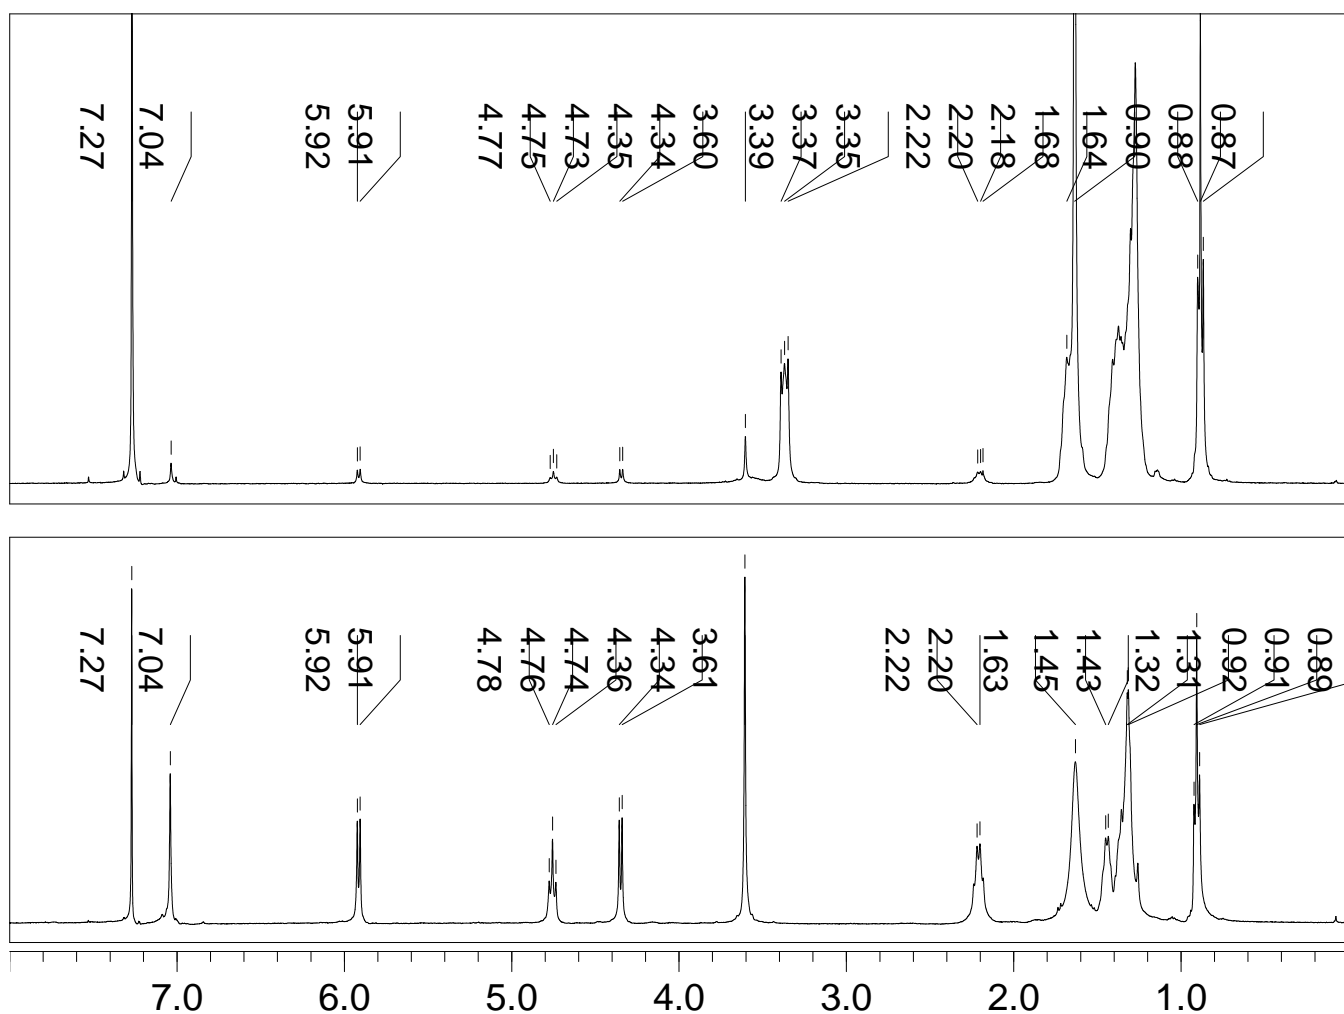

**Fig. S13**  $^1\text{H}$ -NMR spectra of inverse micelle formed from TOABr and resorcinarene amine surfactant (top) and resorcinarene amine (bottom).

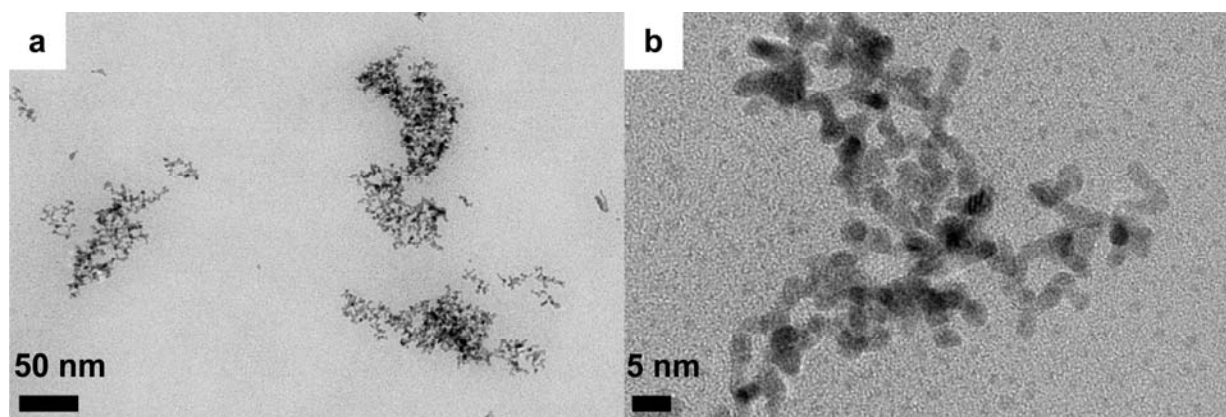

**Fig. S14** TEM analysis of as-prepared bimetallic PdPt nanoparticles after Suzuki cross-coupling reaction.
